# Supplementary material
Source: PubMed Central journal article supplement (PMC7725863)
Supplement: NIHMS1634028-supplement-1.pdf [file NIHMS1634028-supplement-1.pdf]

## Supplemental Materials

### A. First Pairing

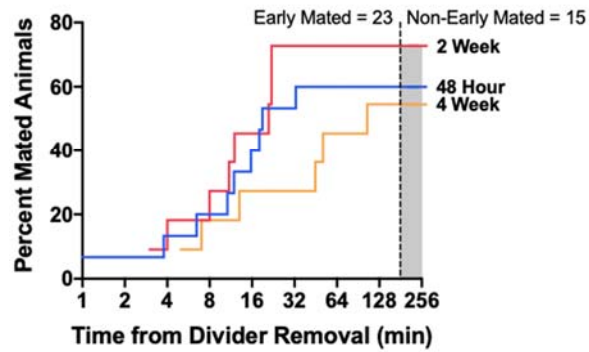

### B. Second Pairing

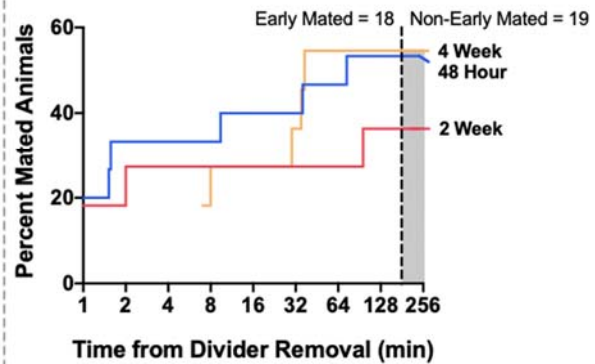

**Supplemental Figure 1. Mating latency comparison across 3 separation groups. A)** There were no significant group differences in latency to mate with the first partner ( $p = 0.505$ ). **B)** There were no significant group differences in latency to mate with the second partner ( $p = 0.653$ ).

| Experiment                              | Partner           | Measurement                            | Statistical Test       | Comparison           | ° of freedom, error | F or T       | p            | *      | Group Size                       | Fig.                   | Notes                           |
|-----------------------------------------|-------------------|----------------------------------------|------------------------|----------------------|---------------------|--------------|--------------|--------|----------------------------------|------------------------|---------------------------------|
| Partner preference                      | 1                 | Prop. Partner huddle                   | RM-ANOVA               | Time (RM)            | 1, 36               | 1.726        | 0.197        |        | n = 37                           | 2A                     | no data for 2242, long term PPT |
|                                         |                   | Short Term                             | one way T-test         | relative to 50%      | 37                  | 2.495        | 0.017        | *      | n = 38                           |                        |                                 |
|                                         |                   | Long Term                              | one way T-test         | relative to 50%      | 36                  | 4.667        | 0.000        | ***    | n = 37                           |                        |                                 |
|                                         |                   | Group differences prop. Partner huddle | RM-ANOVA               | Time (RM)            | 1, 34               | 1.444        | 0.238        |        | 48 hr = 15, 2 wk = 11, 4 wk = 11 | not shown              |                                 |
|                                         |                   |                                        |                        | Time x group         | 2, 34               | 2.19         | 0.127        |        |                                  |                        |                                 |
|                                         |                   |                                        |                        | Group                | 2, 34               | 0.091        | 0.913        |        |                                  |                        |                                 |
|                                         |                   | 48hr, short term                       | one way T-test         | relative to 50%      | 16                  | 1.428        | 0.174        |        |                                  |                        |                                 |
|                                         |                   | 48hr, long term                        | one way T-test         | relative to 50%      | 15                  | 4.24         | 0.001        | **     |                                  |                        |                                 |
|                                         |                   | 2 wk, short term                       | one way T-test         | relative to 50%      | 10                  | 0.77         | 0.459        |        |                                  |                        |                                 |
|                                         |                   | 2 wk, long term                        | one way T-test         | relative to 50%      | 10                  | 3.261        | 0.009        | **     |                                  |                        |                                 |
|                                         |                   | 4 wk, short term                       | one way T-test         | relative to 50%      | 10                  | 2.163        | 0.056        |        |                                  |                        |                                 |
|                                         |                   | 4 wk, long term                        | one way T-test         | relative to 50%      | 10                  | 1.009        | 0.337        |        |                                  |                        |                                 |
|                                         |                   | Short vs long term, partner 1          | partner time           | pearson, spearman    |                     | 0.335, 0.341 | 0.043, 0.039 | *      | n = 37                           |                        |                                 |
|                                         |                   |                                        | partner huddle         | pearson, spearman    |                     | 0.347, 0.417 | 0.036, 0.010 | *      | n = 37                           |                        |                                 |
|                                         |                   |                                        | percent partner huddle | pearson, spearman    |                     | 0.290, 0.387 | 0.081, 0.018 | *      | n = 37                           |                        |                                 |
|                                         |                   |                                        | novel time             | pearson, spearman    |                     | 0.413, 0.423 | 0.011, 0.009 | *      | n = 37                           |                        |                                 |
| novel huddle                            | pearson, spearman |                                        |                        | 0.294, 0.353         | 0.077, 0.032        | *            | n = 37       |        |                                  |                        |                                 |
| Ndist/Pdist corr with Pctpartner huddle | Short term        | pearson, spearman                      |                        | 0.782, 0.827         | 6.7e-9, 1.55e-10    | ***          | n = 38       | 2D     |                                  |                        |                                 |
| Ndist/Pdist corr with Pctpartner huddle | Long term         | pearson, spearman                      |                        | 0.760, 0.790         | 1.55e-10, 4.73e-8   | ***          | n = 37       |        |                                  |                        |                                 |
| Huddle time                             | 1                 | Partner huddle time                    | paired t-test          | Time (RM)            | 36.000              | 0.192        | 0.849        |        | n = 37                           | 2B                     | no data for 2242, long term PPT |
| Huddle time                             | 1                 | Novel huddle time                      | paired t-test          | Time (RM)            | 36.000              | 2.347        | 0.025        | *      | n = 37                           |                        |                                 |
| Avg. distance from tethered             | 1                 | Distance when in                       | RM-ANOVA               | Time (RM)            | 1, 36               | 4.090        | 0.051        |        | n = 37                           |                        |                                 |
|                                         |                   |                                        |                        | Tethered animal (RM) |                     | 24.252       | 0.000        | ***    |                                  |                        |                                 |
|                                         |                   |                                        |                        | Time x tethered      |                     | 1.534        | 0.224        |        |                                  |                        |                                 |
|                                         |                   | 48 hr; Paired t-test short term        |                        | 14                   | -3.899              | 0.002        | **           | n = 15 |                                  |                        |                                 |
|                                         |                   | 48 hr; Paired t-test long term         |                        | 14                   | -3.727              | 0.002        | **           |        |                                  |                        |                                 |
|                                         |                   |                                        |                        |                      |                     |              |              |        | 2C                               | no data for 2242, long |                                 |

|                                     |       |                                        |                                |                      |        |              |              |     |             |           |                                    |
|-------------------------------------|-------|----------------------------------------|--------------------------------|----------------------|--------|--------------|--------------|-----|-------------|-----------|------------------------------------|
| partner                             |       | chamber                                | 2 wk; Paired t-test short term |                      | 10     | -2.765       | 0.020        | *   | n = 11      |           | term PPT                           |
|                                     |       |                                        | 2 wk; Paired t-test long term  |                      | 10     | -3.615       | 0.005        | *** |             |           |                                    |
|                                     |       |                                        | 4 wk; Paired t-test short term |                      | 10     | -3.367       | 0.007        | *** | n = 11      |           |                                    |
|                                     |       |                                        | 4 wk; Paired t-test long term  |                      | 10     | -2.334       | 0.042        | *   |             |           |                                    |
| Distance from tethered              | 1     | PminusN distance                       | RM-ANOVA                       | Time (RM)            | 1, 36  | 1.534        | 0.224        |     | n = 37      | not shown | no data for 2242, long term PPT    |
|                                     |       |                                        | RM-ANOVA                       | Time (RM)            | 1, 34  | 1.224        | 0.276        |     |             |           |                                    |
|                                     |       |                                        |                                | Group                | 2, 34  | 0.545        | 0.585        |     |             |           |                                    |
| Time x group                        | 2, 34 | 1.276                                  |                                | 0.292                |        |              |              |     |             |           |                                    |
| Total distance                      | 1     | Total distance traveled by group       | RM-ANOVA                       | Time (RM)            | 1, 34  | 13.993       | 0.001        | **  |             |           |                                    |
|                                     |       |                                        | Group                          | 2, 34                | 3.031  | 0.061        |              |     |             |           |                                    |
|                                     |       |                                        | Time x group                   | 2, 34                | 1.159  | 0.326        |              |     |             |           |                                    |
|                                     |       | Total distance                         | short term vs long term        | pearson, spearman    |        | 0.370, 0.284 | 0.026, 0.093 | **  |             |           |                                    |
| Huddle time                         | 2     | 48hr, 2nd partner; Partner huddle time | RM-ANOVA                       | Time (RM)            | 1, 12  | 3.392        | 0.090        |     | n = 13      | 2B        |                                    |
| Huddle time                         | 2     | 48hr, 2nd partner; Novel huddle time   | RM-ANOVA                       | Time (RM)            | 1, 12  | 2.106        | 0.172        |     | n = 13      |           |                                    |
| Huddle time                         | 2     | 2wk, 2nd partner; Partner huddle time  | RM-ANOVA                       | Time (RM)            | 1, 9   | 2.754        | 0.131        |     | n = 10      | 2E        |                                    |
| Huddle time                         | 2     | 2wk, 2nd partner; Novel huddle time    | RM-ANOVA                       | Time (RM)            | 1, 9   | 6.424        | 0.032        | *   | n = 10      |           |                                    |
| Huddle time                         | 2     | 4wk, 2nd partner; Partner huddle time  | RM-ANOVA                       | Time (RM)            | 1, 10  | 0.322        | 0.577        |     | n = 11      | 2H        |                                    |
| Huddle time                         | 2     | 4wk, 2nd partner; Novel huddle time    | RM-ANOVA                       | Time (RM)            | 1, 10  | 0.343        | 0.571        |     | n = 11      |           |                                    |
| Avg. distance from tethered partner | 2     | 48hr: Distance when in chamber         | RM-ANOVA                       | Time (RM)            | 1, 12  | 6.405        | 0.026        | *   | n = 13 - 15 | 2C        | excludes 2262, 2267 from long-term |
|                                     |       |                                        |                                | Tethered animal (RM) |        | 5.007        | 0.045        | *   |             |           |                                    |
|                                     |       |                                        |                                | Time x tethered      |        | 1.669        | 0.221        |     |             |           |                                    |
|                                     |       |                                        | Paired t-test short term       | 14                   | -3.727 | 0.002        | **           |     |             |           |                                    |
| Paired t-test long term             | 12    | -1.371                                 | 0.196                          |                      |        |              |              |     |             |           |                                    |
| Avg. distance from tethered         | 2     | 2wk: Distance when in chamber          | RM-ANOVA                       | Time (RM)            | 1, 9   | 2.636        | 0.139        |     |             |           |                                    |
|                                     |       |                                        |                                | Tethered animal (RM) |        | 8.734        | 0.016        | *   |             |           |                                    |
|                                     |       |                                        |                                | Time x tethered      |        | 3.290        | 0.103        |     |             |           |                                    |

|                                     |   |                                  |                                  |                        |                   |              |               |                   |        |                                 |                                                                                                                            |    |
|-------------------------------------|---|----------------------------------|----------------------------------|------------------------|-------------------|--------------|---------------|-------------------|--------|---------------------------------|----------------------------------------------------------------------------------------------------------------------------|----|
| partner                             |   |                                  | Paired t-test short term         |                        | 10                | -3.615       | 0.005         | **                |        |                                 |                                                                                                                            |    |
|                                     |   |                                  | Paired t-test long term          |                        | 9                 | -0.623       | 0.549         |                   |        |                                 |                                                                                                                            |    |
| Avg. distance from tethered partner | 2 | 4 wk: Distance when in chamber   | RM-ANOVA                         | Time (RM)              | 1, 10             | 1.655        | 0.227         |                   | n = 11 | 2I                              | excludes 2242                                                                                                              |    |
|                                     |   |                                  |                                  | Tethered animal (RM)   |                   | 19.06        | 0.001         |                   |        |                                 |                                                                                                                            |    |
|                                     |   |                                  |                                  | Time x tethered        |                   | 1.872        | 0.201         |                   |        |                                 |                                                                                                                            |    |
|                                     |   |                                  | Paired t-test short term         | 10                     | -2.334            | 0.042        | *             |                   |        |                                 |                                                                                                                            |    |
|                                     |   |                                  | Paired t-test long term          | 10                     | -4.1              | 0.002        | **            |                   |        |                                 |                                                                                                                            |    |
| Partner preference                  | 2 | Proportion partner huddle time   | RM-ANOVA                         | Time (RM)              | 1, 31             | 4.991        | 0.033         | *                 | 3A,D,G | excludes 1872, 2242, 2262, 2267 |                                                                                                                            |    |
|                                     |   |                                  |                                  | Time x group           | 2, 31             | 3.263        | 0.052         |                   |        |                                 |                                                                                                                            |    |
|                                     |   |                                  |                                  | Group                  | 2, 31             | 0.342        | 0.712         |                   |        |                                 |                                                                                                                            |    |
|                                     |   | 48hr, short term                 | one way T-test                   | relative to 50%        | 14                | 2.584        | 0.022         | *                 | n = 15 | 3A                              | excludes 1872                                                                                                              |    |
|                                     |   | 48hr, long term                  | one way T-test                   | relative to 50%        | 12                | 1.119        | 0.285         |                   | n = 13 |                                 |                                                                                                                            |    |
|                                     |   | 48hr                             | Paired t-test short vs long term | Percent huddle         | 12                | 2.031        | 0.065         |                   |        |                                 |                                                                                                                            |    |
|                                     |   | 2 wk, short term                 | one way T-test                   | relative to 50%        | 10                | 3.833        | 0.003         | **                | n = 11 |                                 |                                                                                                                            |    |
|                                     |   | 2wk, long term                   | one way T-test                   | relative to 50%        | 9                 | 0.194        | 0.850         |                   | n = 10 |                                 |                                                                                                                            |    |
|                                     |   | 2 wk                             | Paired t-test short vs long term | Percent huddle         | 9                 | 3.297        | 0.009         | **                |        | 3D                              |                                                                                                                            |    |
|                                     |   | 4wk, short term                  | one way T-test                   | relative to 50%        | 10                | 1.985        | 0.075         |                   | n = 11 |                                 |                                                                                                                            |    |
|                                     |   | 4 wk, long term                  | one way T-test                   | relative to 50%        | 10                | 2.901        | 0.016         | *                 |        | 3G                              |                                                                                                                            |    |
|                                     |   | 4 wk                             | Paired t-test short vs long term | Percent huddle         | 10                | -0.553       | 0.592         |                   |        |                                 |                                                                                                                            |    |
| Partner preference                  | 2 | Short vs long term, partner 2    | partner time                     | pearson, spearman      |                   | 0.557, 0.593 | 0.001, 0.0003 | **                | n = 33 | not shown                       | excludes 1872, 2262, 2267, 2245, no data for 1850, 1867, 1924                                                              |    |
|                                     |   |                                  |                                  | partner huddle         | pearson, spearman |              | 0.660, 0.732  | 0.00003, 0.000001 |        |                                 |                                                                                                                            | ** |
|                                     |   |                                  |                                  | percent partner huddle | pearson, spearman |              | 0.535, 0.560  | 0.001, 0.001      |        |                                 |                                                                                                                            | ** |
|                                     |   |                                  |                                  | novel time             | pearson, spearman |              | 0.594, 0.520  | 0.000268, 0.002   |        |                                 |                                                                                                                            | ** |
|                                     |   |                                  |                                  | novel huddle           | pearson, spearman |              | 0.614, 0.374  | 0.000147, 0.032   |        |                                 |                                                                                                                            | ** |
| Total distance                      | 2 | Total distance traveled by group | RM-ANOVA                         | Time (RM)              | 1, 30             | 1.209        | 0.280         |                   | n = 33 | Not shown                       | 4-week separated group traveled less than 2 week or 48 hour; excludes 1872, 2262, 2267, 2245, no data for 1850, 1867, 1924 |    |
|                                     |   |                                  |                                  | Group                  | 2, 30             | 10.252       | 0.000         | ***               |        |                                 |                                                                                                                            |    |
|                                     |   |                                  |                                  | Time x group           | 2, 30             | 0.212        | 0.810         |                   |        |                                 |                                                                                                                            |    |
|                                     |   | Total distance traveled          | short term vs long term          | pearson, spearman      |                   | 0.215, 0.331 | 0.229, 0.060  |                   |        |                                 |                                                                                                                            |    |

|                                                                                   |                      |                                |                                                   |                              |                |        |                       |    |                                     |           |                                                                                   |
|-----------------------------------------------------------------------------------|----------------------|--------------------------------|---------------------------------------------------|------------------------------|----------------|--------|-----------------------|----|-------------------------------------|-----------|-----------------------------------------------------------------------------------|
| Mating latency 1st partner - survival analysis                                    | 48 hr vs 2 wk vs 4wk | Latency to mate                | Kaplan Meyer with Log Rank for overall comparison |                              | Chi sq = 1.367 | df = 2 | 0.505                 |    |                                     | S1A       |                                                                                   |
| Mating latency 2nd partner - survival analysis                                    | 48 hr vs 2 wk vs 4wk | Latency to mate                | Kaplan Meyer with Log Rank for overall comparison |                              | Chi sq = 0.852 | df = 2 | 0.653                 |    |                                     | S1B       | excludes 2242                                                                     |
| Mating latency 1st vs 2nd partner                                                 | 1st vs 2nd           | Latency to mate                | Kaplan Meyer with Log Rank for overall comparison |                              | Chi sq = 0.565 | df = 1 | 0.452                 |    |                                     | 4C        | excludes 2242                                                                     |
| Proportion mated within 3 hours                                                   | 1st vs 2nd           |                                | Fisher exact                                      |                              | F = 0.313      |        | 0.187                 |    |                                     | 4A, B     |                                                                                   |
| Mating latency 1st vs 2nd partner                                                 | Correlation          | Latency to mate                |                                                   | pearson, spearman            |                |        | 0.193, 0.176          |    |                                     | not shown | non-maters assigned 10800; 9 animals (24%) did not mate early with either partner |
| Avg. distance from tethered partner for early and late mating animals             | 1                    | Distance when in chamber       | RM-ANOVA                                          | Time (RM)                    | 1, 35          | 0.220  | 0.642                 |    | Early mating = 23; Late mating = 14 | Not shown |                                                                                   |
|                                                                                   |                      |                                |                                                   | Time x latency               | 1, 35          | 0.683  | 0.414                 |    |                                     |           |                                                                                   |
|                                                                                   |                      |                                |                                                   | Latency (early vs non-early) | 1, 35          | 0.029  | 0.866                 |    |                                     |           |                                                                                   |
| Avg. distance from tethered novel for early and late mating animals               | 1                    | Distance when in chamber       | RM-ANOVA                                          | Time (RM)                    | 1, 35          | 3.818  | 0.059                 |    | Early mating = 23; Late mating = 14 | Not shown |                                                                                   |
|                                                                                   |                      |                                |                                                   | Time x latency               | 1, 35          | 0.007  | 0.933                 |    |                                     |           |                                                                                   |
|                                                                                   |                      |                                |                                                   | Latency (early vs non-early) | 1, 35          | 0.507  | 0.481                 |    |                                     |           |                                                                                   |
| Avg. distance from tethered partner minus novel for early and late mating animals | 1                    | Distance when in chamber       | RM-ANOVA                                          | Time (RM)                    | 1, 35          | 1.122  | 0.297                 |    | Early mating = 23; Late mating = 14 | Not shown |                                                                                   |
|                                                                                   |                      |                                |                                                   | Time x latency               | 1, 35          | 0.287  | 0.595                 |    |                                     |           |                                                                                   |
|                                                                                   |                      |                                |                                                   | Latency (early vs non-early) | 1, 35          | 0.097  | 0.757                 |    |                                     |           |                                                                                   |
| Partner preference                                                                | 1                    | Proportion partner huddle time | RM-ANOVA                                          | Time (RM)                    | 1, 35          | 1.21   | 0.279                 |    | Early mating = 23; Late mating = 14 | 4D, E     | 2242 only had data for short term                                                 |
|                                                                                   |                      |                                |                                                   | Time x latency               | 1, 35          | 0.458  | 0.503                 |    |                                     |           |                                                                                   |
|                                                                                   |                      |                                |                                                   | Latency (early vs non-early) | 1, 35          | 0.002  | 0.969                 |    |                                     |           |                                                                                   |
|                                                                                   |                      | Early maters, short term       | one way T-test                                    | relative to 50%              | 22             | 1.752  | 0.094                 |    |                                     |           |                                                                                   |
|                                                                                   |                      | Late maters, short term        | one way T-test                                    | relative to 50%              | 14             | 1.766  | 0.099                 |    |                                     |           |                                                                                   |
|                                                                                   |                      | Early maters, long term        | one way T-test                                    | relative to 50%              | 22             | 4.13   | 0.000                 | ** |                                     |           |                                                                                   |
| Proportion partner huddle time                                                    | RM-ANOVA             | Time (RM)                      | 1, 32                                             | 4.533                        | 0.041          | *      | Early = 16, Late = 18 |    |                                     |           |                                                                                   |
|                                                                                   |                      | Time x latency                 |                                                   | 1.296                        | 0.263          |        |                       |    |                                     |           |                                                                                   |
|                                                                                   |                      | Latency (early vs non-early)   |                                                   | 9.077                        | 0.005          | **     |                       |    |                                     |           |                                                                                   |

|                                     |        |                          |                      |                      |       |        |       |      |                                 |                                               |                                                   |
|-------------------------------------|--------|--------------------------|----------------------|----------------------|-------|--------|-------|------|---------------------------------|-----------------------------------------------|---------------------------------------------------|
| Partner preference                  | 2      | Early maters, short term | one way T-test       | relative to 50%      | 17    | 10.302 | 0.998 | **** | 4F, G                           | Excluded 1872, 2262, 2267 from long term test |                                                   |
|                                     |        | Late maters, short term  | one way T-test       | relative to 50%      | 18    | 1.048  | 0.309 |      |                                 |                                               |                                                   |
|                                     |        | Early maters, long term  | one way T-test       | relative to 50%      | 15    | 3.832  | 0.002 | **   |                                 |                                               |                                                   |
|                                     |        | Late maters, long term   | one way T-test       | relative to 50%      | 17    | 0.501  | 0.623 |      |                                 |                                               |                                                   |
|                                     |        |                          |                      |                      |       |        |       |      |                                 |                                               |                                                   |
| Huddle time                         | 1 vs 2 | Partner 2 huddle time    | ANOVA                | Group                | 1, 30 | 1.06   | 0.359 |      | 48 hr = 14, 2 wk = 10, 4 wk = 9 | 5A                                            |                                                   |
|                                     |        | Partner 1 huddle time    | ANOVA                | Group                | 1, 30 | 2.455  | 0.103 |      |                                 |                                               |                                                   |
| Partner preference                  | 1 vs 2 | 48 hr group              | one way T-test       | relative to 50%      | 13    | -0.025 | 0.981 |      | n = 14                          | 5A                                            |                                                   |
|                                     |        | 2wk group                | one way T-test       | relative to 50%      | 9     | 0.871  | 0.406 |      | n = 10                          |                                               |                                                   |
|                                     |        | 4wk group                | one way T-test       | relative to 50%      | 8     | 10.658 | 0.000 | ***  | n = 9                           |                                               |                                                   |
| Avg. distance from tethered partner | 1 vs 2 | Distance when in chamber | RM-ANOVA             | Group                | 2, 30 | 2.281  | 0.120 |      | 48 hr = 14, 2 wk = 10, 4 wk = 9 | 5B                                            | excluded 2245, no data for 1850, 1867, 1942, 2242 |
|                                     |        |                          |                      | Tethered animal (RM) | 1, 30 | 17.062 | 0.000 | ***  |                                 |                                               |                                                   |
|                                     |        |                          |                      | Group x tethered     | 2, 30 | 6.480  | 0.005 | **   |                                 |                                               |                                                   |
|                                     |        |                          | 48 hr: Paired t-test |                      | 13    | -0.578 | 0.573 |      |                                 |                                               |                                                   |
|                                     |        |                          | 2 wk: Paired t-test  |                      | 9     | -1.064 | 0.315 |      |                                 |                                               |                                                   |
|                                     |        |                          | 4 wk: Paired t-test  |                      | 8     | -7.953 | 0.000 | ***  |                                 |                                               |                                                   |
| Total Distance by group             | 1 vs 2 | Total distance by group  | ANOVA                | Group                | 2, 30 | 0.002  | 0.998 |      | 48 hr = 14, 2 wk = 10, 4 wk = 9 | Not shown                                     | excluded 2245, no data for 1850, 1867, 1942, 2242 |

**Supplemental Table 2 Excluded Animals.**

| <b>Animal</b> | <b>Separation Condition</b> | <b>Test Excluded From</b> | <b>Reason for Exclusion</b>          |
|---------------|-----------------------------|---------------------------|--------------------------------------|
| 1872          | 2 Week                      | P2 Long term              | Death of Partner                     |
| 1850          | 4 Week                      | P1 vs P2                  | Death of Partner                     |
| 1867          | 4 Week                      | P1 vs P2                  | Death of Partner                     |
| 1924          | 2 Week                      | P1 vs P2                  | Death of Partner                     |
| 2242          | 48 Hour                     | P1 long term, P2 all      | Death of Partner                     |
| 2245          | 48 Hour                     | P1 vs P2                  | Escaped Apparatus                    |
| 2262          | 48 Hour                     | P2 long term              | Camera shift so box was out of frame |
| 2267          | 48 Hour                     | P2 long term              | Camera shift so box was out of frame |

P1 = partner 1, P2 = partner 2
